# Supplementary material
Source: MDPI journal article supplement (https://www.mdpi.com/2076-3417/10/3/752)
Supplement: s1 [file s1]

Table 1. The results of BET measurement.

| Sample                                                       | C       | C-Ag    | PVA/BC/C-Ag |
|--------------------------------------------------------------|---------|---------|-------------|
| Adsorption average pore size (nm)                            | 2.070   | 2.396   | 5.846       |
| Langmuir specific surface area ( $\text{m}^2\text{g}^{-1}$ ) | 740.519 | 261.415 | 10.274      |
| Total adsorption volume ( $\text{cm}^3\text{g}^{-1}$ )       | 0.367   | 0.150   | 0.012       |

Table 2. Plate count of *E. coli* colonies after continuous treatment.

| Bacterial suspension<br>(Number of colonies) | After bacteriostasis<br>(Number of colonies) | Antibacterial rate (%) |
|----------------------------------------------|----------------------------------------------|------------------------|
| 278                                          | 54                                           | 80.6                   |

Table 3. Plate count of *E. coli* colonies after repeated treatment.

| Repeat times                                 | 1    | 2    | 3    | 4    | 5    |
|----------------------------------------------|------|------|------|------|------|
| Bacterial suspension<br>(Number of colonies) | 285  | 276  | 282  | 274  | 278  |
| After bacteriostasis<br>(Number of colonies) | 8    | 11   | 22   | 30   | 37   |
| Antibacterial rate (%)                       | 97.2 | 96.0 | 92.2 | 89.1 | 86.7 |

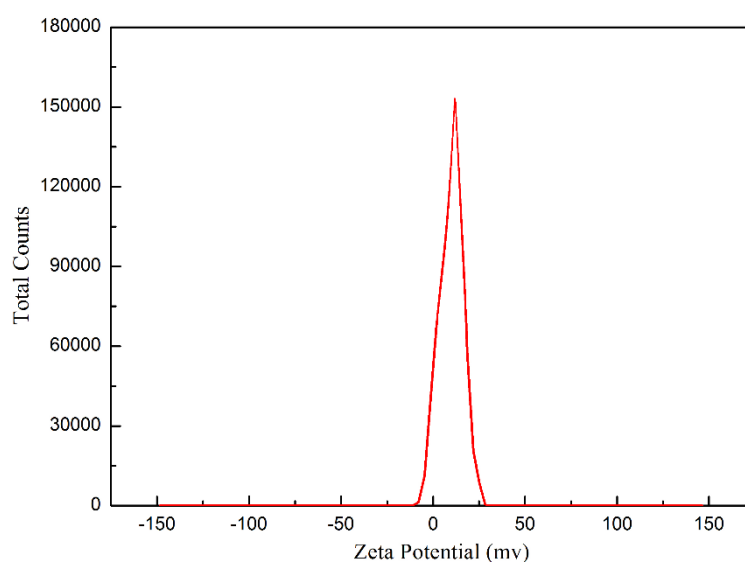

Figure 1. Zeta potential analysis of the PVA/BC/C-Ag composite.
